# Supplementary material
Source: PubMed Central journal article supplement (PMC4649192)
Supplement: AAC.01469-15_zac012154619so1.pdf [file AAC.01469-15_zac012154619so1.pdf]

## Supplementary Material

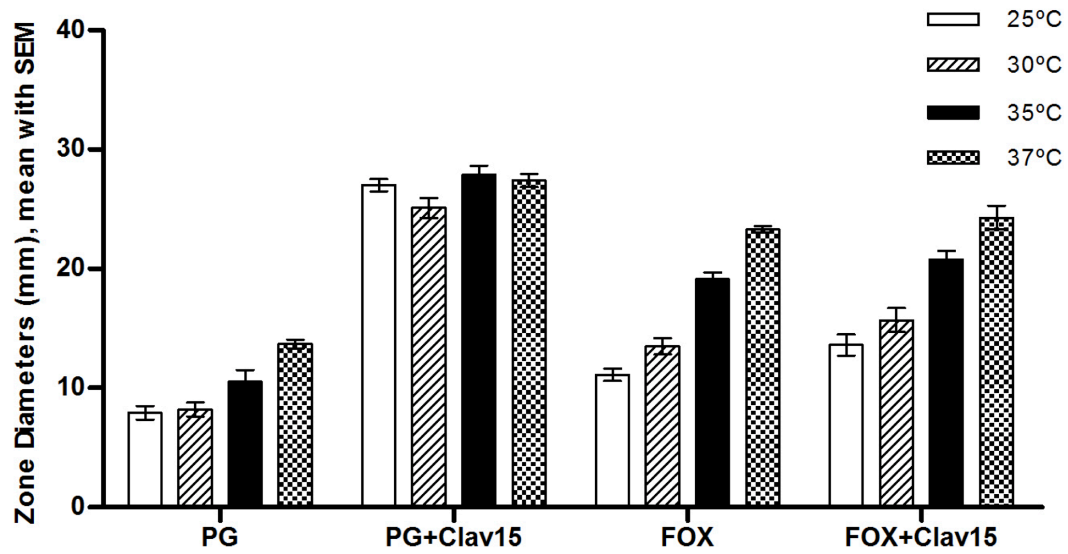

**Figure S1:** The effect of different incubation temperatures (°C) on antimicrobial susceptibility testing for *mecC*-MRSA strains (n=10). Penicillin (PG) and cefoxitin (FOX) disc diffusion was performed on Iso-Sensitest agar (ISA) with or without 15 µg/ml clavulanic acid.

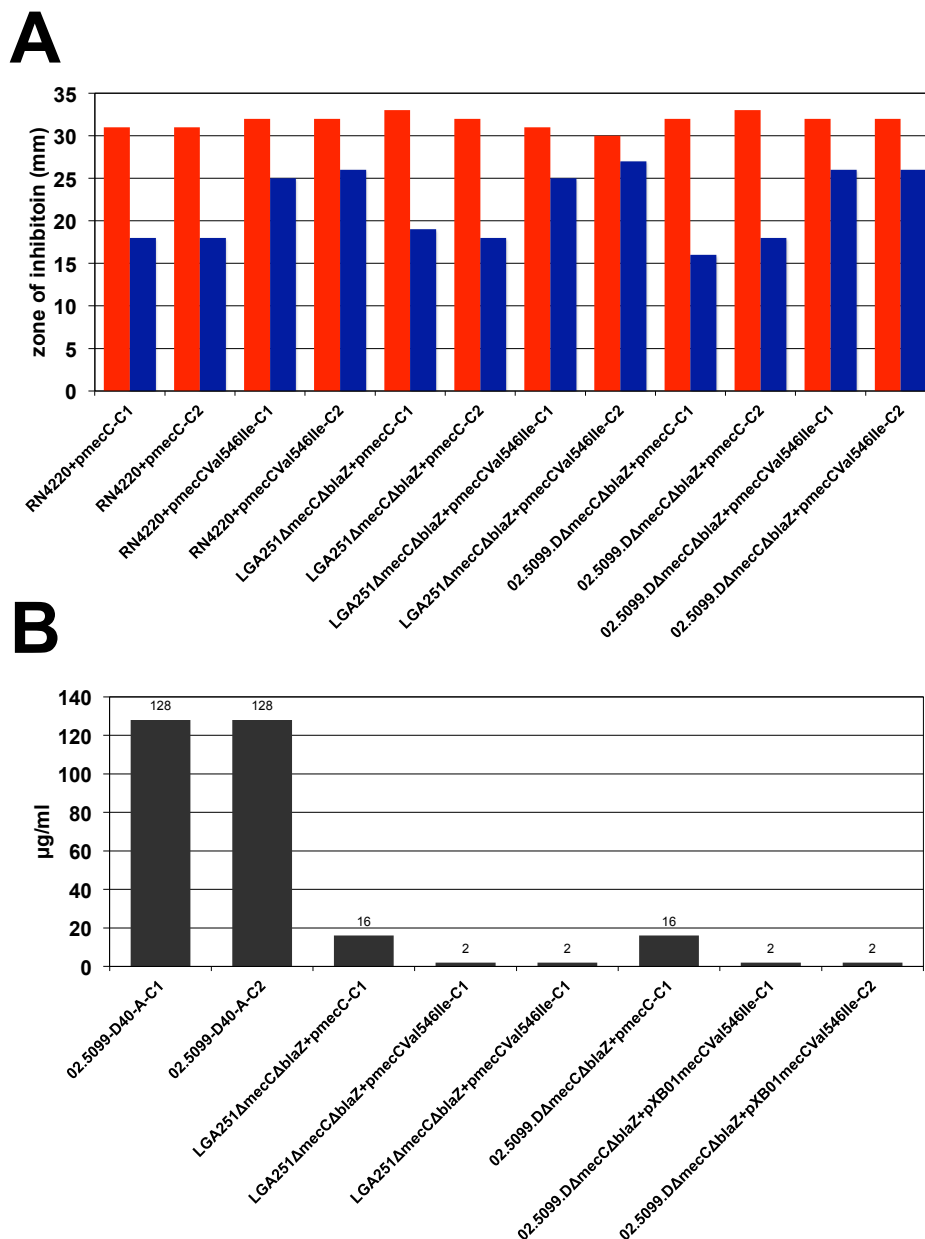

**Figure S2:** Effect of PBP2c Val546Ile substitution. (A) Comparison of disc diffusion results for penicillin (PG) (red bars) and cefoxitin (FOX) (blue bars) of strains RN4220, LGA251Δ*mecC*Δ*blaZ* and 02.5099.DΔ*mecC*Δ*blaZ* carrying plasmid borne copies of wildtype *mecC* and *mecC*<sup>Val546Ile</sup>. C1 and C2 denote clone 1 and clone 2, respectively. (B) Comparison of minimum inhibitory concentrations for cefoxitin (FOX) of wildtype strain and strains RN4220, LGA251Δ*mecC*Δ*blaZ* and 02.5099.DΔ*mecC*Δ*blaZ* carrying plasmid borne copies of wildtype *mecC* and *mecC*<sup>Val546Ile</sup>. C1 and C2 denote clone 1 and clone 2, respectively.

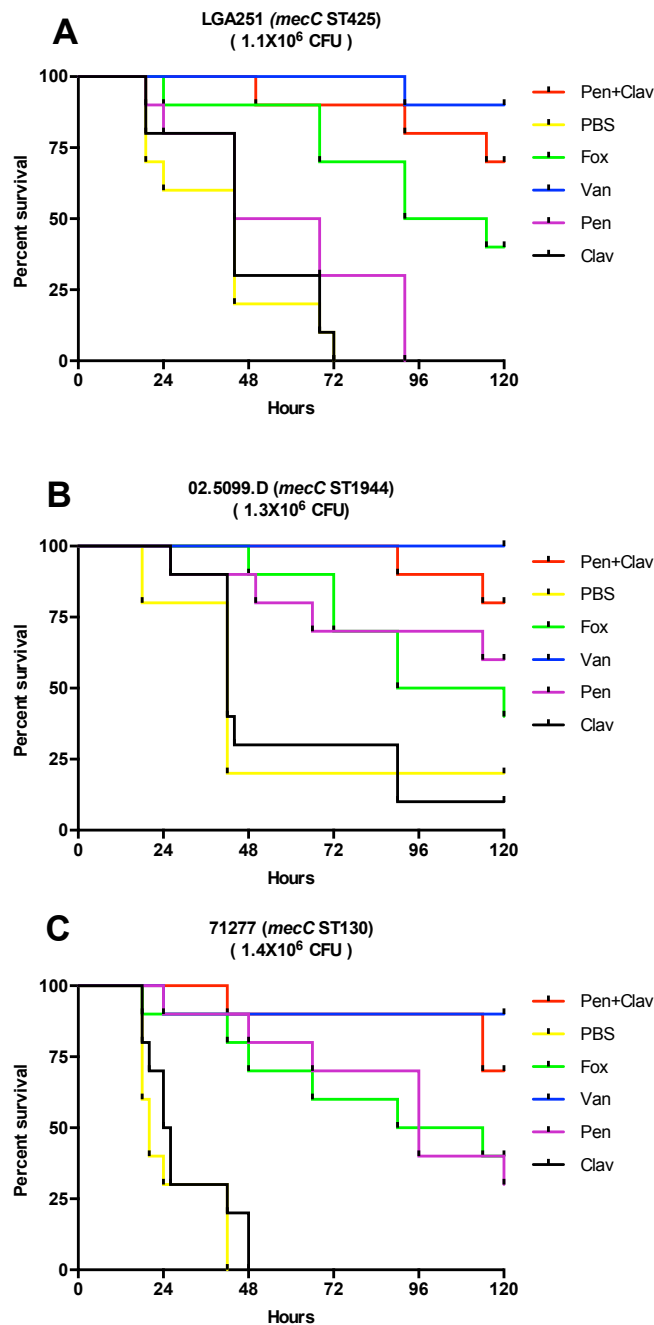

**Figure S3:** Biological repeats of experimental treatment of *Galleria mellonella* infected by *mecC*-MRSA strains: (A) LGA251 (B) 02.5099.D (C) 71277. Ten larvae in each group were experimentally infected and then treated at 2, 24 and 48 hours with Vancomycin ( $50 \text{ mg/kg} / 6.73 \times 10^{-9} \text{ mol}$ ), Penicillin ( $20 \text{ mg/kg} / 1.12 \times 10^{-8} \text{ mol}$ ), Clavulanic acid ( $20 \text{ mg/kg} / 1.69 \times 10^{-8} \text{ mol}$ ), Penicillin / Clavulanic acid, Cefoxitin ( $40 \text{ mg/kg} / 1.78 \times 10^{-8} \text{ mol}$ ), and PBS alone. Fig. shows a representative image of a single experiment.

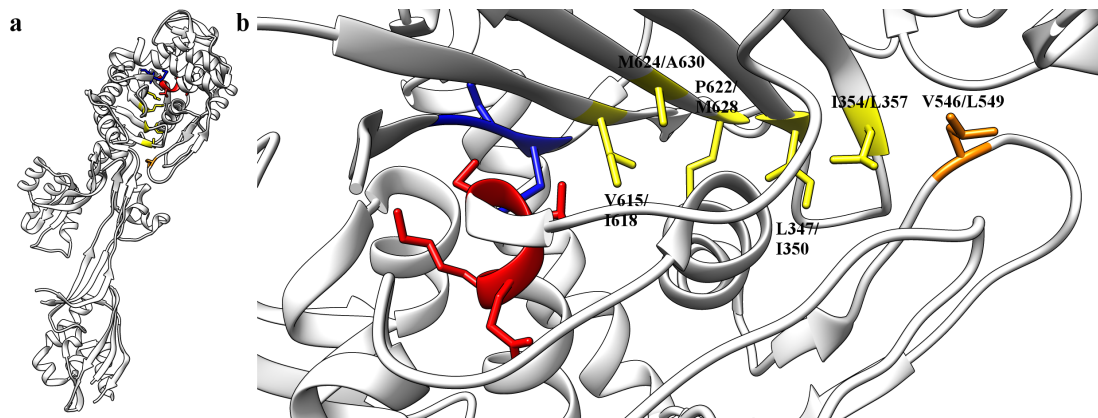

**Figure S4:** Structural view of PBP2a (A) in context of fold (B) close-up. Residues numbered first PBP2c and PBP2a second. SxxK motif in red and KT/SG motif in blue. Produced using UCSF Chimera (<http://www.cgl.ucsf.edu/chimera/>); from PDB code 1VQQ (PBP2a).

**Table S3:** Comparison of minimum inhibitory concentration of penicillin (PG) and cefoxitin (FOX) after *in vitro* selection for penicillin-resistance in strains lacking the SCCmec type XI encoded *blaZ*. C1, C2, C3 indicate multiple individual colonies tested.

| Strains                                | PG $\mu\text{g/ml}$ | FOX $\mu\text{g/ml}$ |
|----------------------------------------|---------------------|----------------------|
| LGA251 $\Delta$ <i>blaZ</i>            | 0.015               | 8                    |
| LGA251 $\Delta$ <i>blaZ</i> -D9-C1     | 8                   | 128                  |
| LGA251 $\Delta$ <i>blaZ</i> -D9-C2     | 8                   | 128                  |
| LGA251 $\Delta$ <i>blaZ</i> -D9-C3     | 8                   | 128                  |
| 02.5099.D $\Delta$ <i>blaZ</i>         | 0.0625              | 8                    |
| 02.5099.D $\Delta$ <i>blaZ</i> -D13-C1 | 16                  | 128                  |
| 02.5099.D $\Delta$ <i>blaZ</i> -D13-C2 | 16                  | >128                 |
| 02.5099.D $\Delta$ <i>blaZ</i> -D13-C3 | 16                  | >128                 |

Note for the table: 20 hours, at 35°C. MIC breakpoint for PG is 0.12  $\mu\text{g/ml}$ ; for FOX is 4  $\mu\text{g/ml}$ . PG concentration range is 0.03125-128  $\mu\text{g/ml}$ . FOX concentration range is 1-128  $\mu\text{g/ml}$ . D9 = day 9 and D13 = day 13.

**Table S5:** Bacterial strains, plasmids and primers used in this study.

| Bacterial strains, plasmids or primers                                    | Description                                                                                                                   | Reference               |
|---------------------------------------------------------------------------|-------------------------------------------------------------------------------------------------------------------------------|-------------------------|
| <b><i>E. coli</i> strains</b>                                             |                                                                                                                               |                         |
| DC10B                                                                     | $\Delta dcm$ in the DH10B background; Dam methylation only                                                                    | (1)                     |
| <b><i>S. aureus</i> strains</b>                                           |                                                                                                                               |                         |
| RN4220                                                                    | Derived from NCTC8325-4, selected for transformability with DNA from <i>E. coli</i>                                           | (2)                     |
| RN4220(pXB01mecC)                                                         | RN4220 with wildtype <i>mecC</i>                                                                                              | This study              |
| RN4220(pXB01mecCVal546Ile)                                                | RN4220 with mutated <i>mecC</i>                                                                                               | This study              |
| LGA251                                                                    | ST425, <i>mecC</i> reference strain                                                                                           | (3)                     |
| LGA251 $\Delta$ <i>mecC</i>                                               | LGA251 with <i>mecC</i> deletion                                                                                              | This study              |
| LGA251 $\Delta$ <i>blaZ</i>                                               | LGA251 with <i>blaZ</i> deletion                                                                                              | This study              |
| LGA251 $\Delta$ <i>mecC</i> $\Delta$ <i>blaZ</i>                          | LGA251 with <i>mecC</i> and <i>blaZ</i> deletion                                                                              | This study              |
| LGA251 $\Delta$ <i>mecC</i> (pXB01)                                       | LGA251 $\Delta$ <i>mecC</i> with empty plasmid pXB01                                                                          | This study              |
| LGA251 $\Delta$ <i>blaZ</i> (pXB01)                                       | LGA251 $\Delta$ <i>blaZ</i> with empty plasmid pXB01                                                                          | This study              |
| LGA251 $\Delta$ <i>mecC</i> $\Delta$ <i>blaZ</i> (pXB01)                  | LGA251 $\Delta$ <i>mecC</i> $\Delta$ <i>blaZ</i> with empty plasmid pXB01                                                     | This study              |
| LGA251 $\Delta$ <i>mecC</i> (pXB01- <i>mecC</i> )                         | LGA251 $\Delta$ <i>mecC</i> complemented with pXB01- <i>mecC</i>                                                              | This study              |
| LGA251 $\Delta$ <i>blaZ</i> (pXB01- <i>blaZ</i> )                         | LGA251 $\Delta$ <i>blaZ</i> complemented with pXB01- <i>blaZ</i>                                                              | This study              |
| LGA251 $\Delta$ <i>mecC</i> $\Delta$ <i>blaZ</i> (pXB01- <i>mecC</i> )    | LGA251 $\Delta$ <i>mecC</i> $\Delta$ <i>blaZ</i> complemented with pXB01- <i>mecC</i>                                         | This study              |
| LGA251 $\Delta$ <i>mecC</i> $\Delta$ <i>blaZ</i> (pXB01- <i>blaZ</i> )    | LGA251 $\Delta$ <i>mecC</i> $\Delta$ <i>blaZ</i> complemented with pXB01- <i>blaZ</i>                                         | This study              |
| 02.5099.D                                                                 | CC130, <i>mecC</i> clinical isolate                                                                                           | (3)                     |
| 02.5099.D $\Delta$ <i>mecC</i> (pXB01)                                    | 02.5099.D with <i>mecC</i> deletion                                                                                           | This study              |
| 02.5099.D $\Delta$ <i>blaZ</i> (pXB01)                                    | 02.5099.D with <i>blaZ</i> deletion                                                                                           | This study              |
| 02.5099.D $\Delta$ <i>mecC</i> $\Delta$ <i>blaZ</i> (pXB01)               | 02.5099.D with <i>mecC</i> and <i>blaZ</i> deletion                                                                           | This study              |
| 02.5099.D $\Delta$ <i>mecC</i>                                            | 02.5099.D $\Delta$ <i>mecC</i> with empty plasmid pXB01                                                                       | This study              |
| 02.5099.D $\Delta$ <i>blaZ</i>                                            | 02.5099.D $\Delta$ <i>blaZ</i> with empty plasmid pXB01                                                                       | This study              |
| 02.5099.D $\Delta$ <i>mecC</i> $\Delta$ <i>blaZ</i>                       | 02.5099.D $\Delta$ <i>mecC</i> $\Delta$ <i>blaZ</i> with empty plasmid pXB01                                                  | This study              |
| 02.5099.D $\Delta$ <i>mecC</i> (pXB01- <i>mecC</i> )                      | 02.5099.D $\Delta$ <i>mecC</i> complemented with pXB01- <i>mecC</i>                                                           | This study              |
| 02.5099.D $\Delta$ <i>blaZ</i> (pXB01- <i>blaZ</i> )                      | 02.5099.D $\Delta$ <i>blaZ</i> complemented with pXB01- <i>blaZ</i>                                                           | This study              |
| 02.5099.D $\Delta$ <i>mecC</i> $\Delta$ <i>blaZ</i> (pXB01- <i>mecC</i> ) | 02.5099.D $\Delta$ <i>mecC</i> $\Delta$ <i>blaZ</i> complemented with pXB01- <i>mecC</i>                                      | This study              |
| 02.5099.D $\Delta$ <i>mecC</i> $\Delta$ <i>blaZ</i> (pXB01- <i>blaZ</i> ) | 02.5099.D $\Delta$ <i>mecC</i> $\Delta$ <i>blaZ</i> complemented with pXB01- <i>blaZ</i>                                      | This study              |
| <b>Plasmids</b>                                                           |                                                                                                                               |                         |
| pRMC2                                                                     | <i>E. coli</i> - <i>S. aureus</i> shuttle vector, Amp <sup>r</sup> , Cm <sup>r</sup>                                          | (4)                     |
| pXB01                                                                     | <i>E. coli</i> - <i>S. aureus</i> shuttle vector pRMC2 with <i>bla</i> deletion; Cm <sup>r</sup>                              | This study              |
| pXB01- <i>mecC</i>                                                        | pXB01 with <i>mecC</i> gene from LGA251                                                                                       | This study              |
| pXB01- <i>mecC</i> <sup>Val546Ile</sup>                                   | pXB01 with <i>mecC</i> gene having a G to A mutation at position 1636 producing a Val546Ile substitution                      | This study              |
| pXB01- <i>blaZ</i>                                                        | pXB01 with <i>blaZ</i> gene from LGA251                                                                                       | This study              |
| pIMAY                                                                     | pIMC5 with tetracycline inducible <i>secY</i> antisense from pKOR1; Cm <sup>r</sup>                                           | (1)                     |
| pIMAY $\Delta$ <i>mecC</i>                                                | Modified pIMAY for deleting <i>mecC</i> gene, encompassing the entire gene, insert amplified from LGA251                      | This study              |
| pIMAY $\Delta$ <i>blaZ</i>                                                | Modified pIMAY for deleting <i>blaZ</i> gene, encompassing the entire gene, insert amplified from LGA251                      | This study              |
| pIMAY $\Delta$ <i>mecC</i> $\Delta$ <i>blaZ</i>                           | Modified pIMAY for deleting <i>blaZ</i> gene, encompassing the entire gene, insert amplified from LGA251 $\Delta$ <i>mecC</i> | This study              |
| <b>Primers</b>                                                            |                                                                                                                               |                         |
|                                                                           | <b>Sequence (5'-3') restriction site underlined</b>                                                                           | <b>Restriction site</b> |
| de- <i>bla</i> -F                                                         | ATATATATGCGGCCGCCTGTCAGACCAAGTTTACTC                                                                                          | NotI                    |
| de- <i>bla</i> -R                                                         | ATGCGCATGCGGCCGCACTCTTCTTTTCAATATTA<br>TT                                                                                     | NotI                    |
| $\Delta$ <i>mecC</i> _A                                                   | ATCGGGTACCTAATATGAATGAGTTCATGGC                                                                                               | KpnI                    |
| $\Delta$ <i>mecC</i> _B                                                   | CTCTTCTCCTTTTGTACTAC                                                                                                          |                         |
| $\Delta$ <i>mecC</i> _C                                                   | TAGTACAAAAGGAGGAAGAGTTCGAATACTTCTTTTG<br>ACTTGG                                                                               |                         |
| $\Delta$ <i>mecC</i> _D                                                   | ATCGGAGCTCGTATCGCCACTTTTATTTTGG                                                                                               | SacI                    |
| $\Delta$ <i>mecC</i> _outF                                                | GCTAAATGTAATGCTGGATTGAACC                                                                                                     |                         |
| $\Delta$ <i>mecC</i> _outR                                                | TCTTGTCCATCTGGATAAACAACG                                                                                                      |                         |

|                                |                                                  |      |
|--------------------------------|--------------------------------------------------|------|
| $\Delta blaZ$ _A               | ATATGGTACCAAATATCCCGAGTGATTATCC                  | KpnI |
| $\Delta blaZ$ _B               | CCTACGTTAGCACCATATTTTTTTTCG                      |      |
| $\Delta blaZ$ _C               | AAATATGGTGCTAACGTAGGGTAAGTGAGGTTGCTG<br>AAATTGTA |      |
| $\Delta blaZ$ _D               | ATATGAGCTCCATCATAGAAGTTCCAGACG                   | SacI |
| $\Delta blaZ$ _outF            | TGCCCGCATTGCATTAGCATTAGGA                        |      |
| $\Delta blaZ$ _outR            | AAATATTGGAAGCAAGCCATAGCAG                        |      |
| $\Delta blaZ\Delta mecC$ _A    | ATATGGTACCGGAGATCTAATAGACAAGTC                   | KpnI |
| $\Delta blaZ\Delta mecC$ _outF | GACCATTGGATTCTCTACTTCATCT                        |      |
| catup                          | GGATTTTTCGCTACGCTCAA                             |      |
| catdown                        | AAAGTACAGTCGGCATTATCTCA                          |      |
| IM151                          | TACATGTCAAGAATAAACTGCCAAAGC                      | (1)  |
| IM152                          | AATACCTGTGACGGAAGATCACTTCG                       | (1)  |
| <i>blaZ</i> -F- KpnI           | CGCGGGTACCTATATAGGAGGAATAAAATTG                  | KpnI |
| <i>blaZ</i> -R-SacI            | GCGCGAGCTCTTACTCATTAAATTTTTTAG                   | SacI |
| <i>mecC</i> -F-KpnI            | CGCGGGTACCCAAAAGGAGGAAGAGATG                     | KpnI |
| <i>mecC</i> -R-SacI            | GCGCGAGCTCTTCGAATTACTGATCTAT                     | SacI |
| <i>mecC</i> f                  | GTTCACACCTCACTTCTTAAC                            |      |
| <i>mecC</i> r                  | GTAATCTTTGTGGAAACGC                              |      |
| <i>mecC</i> m                  | GCCGTGTTTATCCATTGAAC                             |      |

#### References:

1. **Monk, I. R., I. M. Shah, M. Xu, M. W. Tan, and T. J. Foster.** 2012. Transforming the untransformable: application of direct transformation to manipulate genetically *Staphylococcus aureus* and *Staphylococcus epidermidis*. *MBio* **3**.
2. **Novick, R.** 1967. Properties of a cryptic high-frequency transducing phage in *Staphylococcus aureus*. *Virology* **33**:155-66.
3. **Garcia-Alvarez, L., M. T. Holden, H. Lindsay, C. R. Webb, D. F. Brown, M. D. Curran, E. Walpole, K. Brooks, D. J. Pickard, C. Teale, J. Parkhill, S. D. Bentley, G. F. Edwards, E. K. Girvan, A. M. Kearns, B. Pichon, R. L. Hill, A. R. Larsen, R. L. Skov, S. J. Peacock, D. J. Maskell, and M. A. Holmes.** 2011. Meticillin-resistant *Staphylococcus aureus* with a novel *mecA* homologue in human and bovine populations in the UK and Denmark: a descriptive study. *Lancet Infect Dis* **11**:595-603.
4. **Corrigan, R. M., and T. J. Foster.** 2009. An improved tetracycline-inducible expression vector for *Staphylococcus aureus*. *Plasmid* **61**:126-9.
